# Supplementary material for: Predictors of fatality including radiographic findings in adults with COVID-19
Source: Springer Nature journal article supplement (doi:10.1186/s12931-020-01411-2), 2020-06-11
Supplement: MOESM1 [file 18074228]

## Supplementary Appendix

Predictors of Fatality including Radiographic Findings in Adults with COVID-19

Kaiyan Li, Dian Chen, Shengchong Chen, Yuchen Feng, Chenli Chang, Zi Wang, Nan Wang, Guohua Zhen

### Table of contents

|                                                                                                                                                                        |    |
|------------------------------------------------------------------------------------------------------------------------------------------------------------------------|----|
| Table S1. Demographics and baseline characteristics of the subset of patients included in the analysis of CTs performed within the first week after symptom onset..... | 2  |
| Table S2. Laboratory findings of the subset of patients included in the analysis of CTs performed within the first week after symptom onset.....                       | 4  |
| Table S3. Risk factors associated with fatality.....                                                                                                                   | 7  |
| Table S4. Risk factors associated with fatality of the subset of patients included in the analysis of CTs performed within the first week after symptom onset.....     | 9  |
| Table S5. Treatments and outcomes.....                                                                                                                                 | 10 |
| Table S6. Treatments and outcomes of the subset of patients included in the analysis of CTs performed within the first week after symptom onset.....                   | 11 |

**Table S1. Demographics and baseline characteristics of the subset of patients included in the analysis of CT within the first week after symptom onset**

|                                                        | Total<br>(n=32)        | Non-survivor<br>(n=11) | Survivor<br>(n=21)     | p<br>value |
|--------------------------------------------------------|------------------------|------------------------|------------------------|------------|
| <b>Characteristics</b>                                 |                        |                        |                        |            |
| Age, years                                             | 58(40-70)              | 69(57-78)              | 51(33-70)              | 0.020      |
| <65                                                    | 20 (62%)               | 5 (45%)                | 15 (71%)               | 0.149      |
| ≥65                                                    | 12 (38%)               | 6 (55%)                | 6 (29%)                |            |
| Sex                                                    |                        |                        |                        | 0.266      |
| Female                                                 | 13 (41%)               | 3 (27%)                | 10 (48%)               |            |
| Male                                                   | 19 (59%)               | 8 (73%)                | 11 (52%)               |            |
| Any Comorbidity                                        | 13 (41%)               | 6 (55%)                | 7 (33%)                | 0.246      |
| Diabetes                                               | 5 (16%)                | 2 (18%)                | 3 (14%)                | 0.773      |
| Hypertension                                           | 9 (28%)                | 5 (45%)                | 4 (19%)                | 0.115      |
| Coronary heart disease                                 | 1 (3%)                 | 1 (9%)                 | 0 (0%)                 | 0.344      |
| Chronic obstructive<br>pulmonary disease               | 1 (3%)                 | 1 (9%)                 | 0 (0%)                 | 0.344      |
| Malignancy                                             | 0 (0%)                 | 0 (0%)                 | 0 (0%)                 | ..         |
| Chronic liver disease                                  | 1 (3%)                 | 0 (0%)                 | 1 (5%)                 | 1.000      |
| Other                                                  | 8 (25%)                | 4 (36%)                | 4 (19%)                | 0.283      |
| Current smoker                                         | 3 (9%)                 | 1 (9%)                 | 2 (10%)                | 0.968      |
| <b>Symptoms and signs</b>                              |                        |                        |                        |            |
| Fever                                                  | 30 (94%)               | 10 (91%)               | 20 (95%)               | 0.631      |
| Highest temperature, °C                                | 38.6(38.0-39.0)        | 38.6(37.6-39.0)        | 38.5(38.0-39.0)        | 0.611      |
| Chills                                                 | 7 (22%)                | 3 (27%)                | 4 (19%)                | 0.593      |
| Cough                                                  | 23 (72%)               | 9 (82%)                | 14 (67%)               | 0.365      |
| Sputum                                                 | 8 (25%)                | 5 (45%)                | 3 (14%)                | 0.053      |
| Dyspnea                                                | 16 (50%)               | 5 (45%)                | 11 (52%)               | 0.710      |
| Hemoptysis                                             | 2 (6%)                 | 1 (9%)                 | 1 (5%)                 | 0.631      |
| Chest pain                                             | 2 (6%)                 | 1 (9%)                 | 1 (5%)                 | 0.631      |
| Headache                                               | 3 (9%)                 | 1 (9%)                 | 2 (10%)                | 0.968      |
| Fatigue                                                | 8 (25%)                | 2 (18%)                | 6 (29%)                | 0.519      |
| Nausea                                                 | 1 (3%)                 | 0 (0%)                 | 1 (5%)                 | 1.000      |
| Diarrhea                                               | 5 (16%)                | 3 (27%)                | 2 (10%)                | 0.189      |
| Myalgia                                                | 7 (22%)                | 3 (27%)                | 4 (19%)                | 0.593      |
| Systolic pressure, mm Hg                               | 129.0(114.0-<br>144.0) | 144.0(125.0-<br>171.0) | 126.0(112.0-<br>139.0) | 0.074      |
| Heart rate, beats per minute                           | 95.0(81.0-110.0)       | 103.0(86.0-<br>111.0)  | 86.0(80.0-109.0)       | 0.367      |
| Respiratory rate                                       | 20.0(20.0-24.0)        | 24.0(20.0-25.0)        | 20.0(20.0-22.0)        | 0.022      |
| >20 breaths per min                                    | 14 (44%)               | 8 (73%)                | 6 (29%)                | 0.017      |
| Time from symptom onset<br>to hospital admission, days | 10.0(7.0-13.0)         | 8.0(6.0-14.0)          | 10.0(7.0-13.0)         | 0.639      |

Data are median (IQR), n (%), or n/N (%), where N is the total number of patients with available data.  $\chi^2$  test, Fisher's exact test, or Mann-Whitney U test were used to compare the values between survivors and non-survivors as appropriate.

**Table S2. Laboratory findings of the subset of patients included in the analysis of CT within the first week after symptom onset**

|                                              | Normal range | Total<br>(n=32)    | Non-survivor<br>(n=11) | Survivor<br>(n=21) | p value |
|----------------------------------------------|--------------|--------------------|------------------------|--------------------|---------|
| White blood cell count, × 10 <sup>9</sup> /L | 4.00-10.00   | 5.2(4.2-8.3)       | 9.1(6.2-11.8)          | 4.7(4.1-5.4)       | 0.000   |
| <4                                           |              | 4 (13%)            | 0 (0%)                 | 4 (19%)            | 0.002   |
| 4-10                                         |              | 23 (72%)           | 6 (55%)                | 17 (91%)           |         |
| >10                                          |              | 5 (15%)            | 5 (45%)                | 0 (0%)             |         |
| Neutrophil count, × 10 <sup>9</sup> /L       | 1.80-6.30    | 3.5(2.8-6.9)       | 8.0(3.5-11.3)          | 2.9(2.7-4.3)       | 0.000   |
| Lymphocyte count, × 10 <sup>9</sup> /L       | 1.10-3.20    | 0.8(0.5-1.2)       | 0.7(0.4-1.5)           | 0.9(0.6-1.2)       | 0.307   |
| <1·1                                         |              | 22 (69%)           | 8 (73%)                | 14 (67%)           | 0.725   |
| ≥1·1                                         |              | 10 (31%)           | 3 (27%)                | 7 (33%)            |         |
| Hemoglobin, g/L                              | 130.0-175.0  | 126.5(120.0-140.0) | 120.0(110.0-135.0)     | 129.0(122.5-141.5) | 0.113   |
| Platelet count, × 10 <sup>9</sup> /L         | 125.0-350.0  | 162.0(124.0-242.0) | 124.0(87.0-242.0)      | 175.0(133.8-287.0) | 0.066   |
| <125                                         |              | 8/31 (26%)         | 6 (55%)                | 2/20 (10%)         | 0.007   |
| ≥125                                         |              | 23/31 (74%)        | 5 (45%)                | 18/20 (90%)        |         |
| Lactate dehydrogenase, U/L                   | 135-225      | 328.0(197.5-541.8) | 570.0(440.0-671.0)     | 261.0(194.5-379.5) | 0.001   |
| ≤225                                         |              | 9 (28%)            | 1 (9%)                 | 8 (38%)            | 0.083   |
| >225                                         |              | 23 (72%)           | 10 (91%)               | 13 (62%)           |         |
| D-dimer, μg/mL                               | ≤0·5         | 0.9(0.5-2.0)       | 2.3(1.6-22.0)          | 0.6(0.4-0.9)       | 0.000   |
| ≤0·5                                         |              | 8 (25%)            | 1 (9%)                 | 7 (33%)            | 0.000   |
| >0·5 to ≤1                                   |              | 11 (34%)           | 0 (0%)                 | 11 (52%)           |         |
| >1                                           |              | 13 (41%)           | 10 (91%)               | 3 (15%)            |         |
| Prothrombin time, s                          | 11.5-14.5    | 14.8(13.8-15.4)    | 15.5(14.8-17.7)        | 14.3(13.4-15.0)    | 0.005   |
| <14.5                                        |              | 14 (44%)           | 2 (18%)                | 12 (57%)           | 0.035   |

|                                               |           |                   |                     |                  |       |
|-----------------------------------------------|-----------|-------------------|---------------------|------------------|-------|
| ≥14.5                                         |           | 18 (56%)          | 9 (82%)             | 9 (43%)          |       |
| International Normalized Ratio, INR           | 0.80-1.20 | 1.15(1.05-1.20)   | 1.21(1.14-1.45)     | 1.09(1.01-1.17)  | 0.005 |
| Hypersensitive troponin I, pg/mL              | ≤34.2     | 11.0(4.2-27.0)    | 23.1(13.0-204.7)    | 6.0(2.3-13.2)    | 0.005 |
|                                               | ≤34.2     | 24/31 (77%)       | 6 (55%)             | 18/20 (90%)      | 0.024 |
|                                               | >34.2     | 7/31 (23%)        | 5 (45%)             | 2/20 (10%)       |       |
| NT-proB-type Natriuretic Peptide (BNP), pg/mL | <241      | 192.0(71.0-702.5) | 777.0(348.5-2847.0) | 90.5(58.8-194.5) | 0.000 |
|                                               | <241      | 17/30 (57%)       | 0 (0%)              | 17/20 (85%)      | 0.000 |
|                                               | ≥241      | 13/30 (43%)       | 10 (100%)           | 3/20 (15%)       |       |
| Albumin, g/L                                  | 35-52     | 33.4(30.1-39.5)   | 31.5(28.2-34.2)     | 36.0(32.2-39.9)  | 0.034 |
|                                               | <35       | 18 (56%)          | 9 (82%)             | 9 (43%)          | 0.035 |
|                                               | ≥35       | 14 (44%)          | 2 (18%)             | 12 (57%)         |       |
| Alanine aminotransferase, U/L                 | ≤41       | 19.5(13.0-28.5)   | 17.0(14.0-29.0)     | 20.0(12.0-27.5)  | 0.725 |
|                                               | ≤41       | 28 (87%)          | 10 (91%)            | 18 (86%)         | 0.673 |
|                                               | >41       | 4 (13%)           | 1 (9%)              | 3 (14%)          |       |
| Aspartate aminotransferase, U/L               | ≤40       | 30.0(19.3-43.0)   | 34.0(24.0-54.0)     | 24.0(19.0-36.0)  | 0.271 |
|                                               | ≤40       | 24 (75%)          | 7 (64%)             | 17 (81%)         | 0.283 |
|                                               | >40       | 8 (25%)           | 4 (36%)             | 4 (19%)          |       |
| Total bilirubin, μmol/L                       | ≤26       | 7.9(6.2-10.3)     | 7.5(6.6-9.8)        | 8.1(6.0-10.9)    | 1.000 |
| Creatinine, μmol/L                            | 59-104    | 68.0(61.3-87.8)   | 100.0(62.0-164.0)   | 67.0(59.5-76.0)  | 0.088 |
|                                               | ≤104      | 27 (84%)          | 6 (55%)             | 21 (100%)        | 0.002 |
|                                               | >104      | 5 (16%)           | 5 (45%)             | 0 (0%)           |       |
| Blood urea nitrogen, mmol/L                   | 3.6-9.5   | 4.7(3.3-8.4)      | 9.2(5.4-13.7)       | 4.0(3.3-5.2)     | 0.008 |
|                                               | ≤9.5      | 26 (81%)          | 6 (55%)             | 20 (95%)         | 0.005 |
|                                               | >9.5      | 6 (19%)           | 5 (45%)             | 1 (5%)           |       |
| Potassium, mmol/L                             | 3.50-5.10 | 4.1(3.5-4.5)      | 4.4(3.6-5.3)        | 4.0(3.5-4.3)     | 0.208 |
|                                               | <3.5      | 7 (22%)           | 2 (18%)             | 5 (24%)          | 0.042 |

|                                                    |           |                    |                      |                    |       |
|----------------------------------------------------|-----------|--------------------|----------------------|--------------------|-------|
| 3.5-5.1                                            |           | 22 (69%)           | 6 (55%)              | 16 (76%)           |       |
| >5.1                                               |           | 3 (9%)             | 3 (27%)              | 0 (0%)             |       |
| Sodium, mmol/L                                     | 136-145   | 139.0(136.4-141.9) | 138.7(137.2-142.6)   | 139.1(135.6-141.7) | 0.938 |
| <136                                               |           | 7 (22%)            | 2 (18%)              | 5 (24%)            | 0.363 |
| 136-145                                            |           | 24 (75%)           | 8 (73%)              | 16 (76%)           |       |
| >145                                               |           | 1 (3%)             | 1 (9%)               | 0 (0%)             |       |
| Calcium, mmol/L                                    | 2.20-2.55 | 2.1(2.0-2.2)       | 2.0(1.9-2.2)         | 2.1(2.0-2.2)       | 0.081 |
| <2.2                                               |           | 25 (78%)           | 10 (91%)             | 15 (71%)           | 0.205 |
| ≥2.2                                               |           | 7 (22%)            | 1 (9%)               | 6 (29%)            |       |
| Procalcitonin, ng/mL                               | <0.05     | 0.05(0.03-0.18)    | 0.32(0.11-0.60)      | 0.04(0.02-0.06)    | 0.000 |
| <0.05                                              |           | 17 (53%)           | 1 (9%)               | 16 (76%)           | 0.000 |
| ≥0.05                                              |           | 15 (47%)           | 10 (91%)             | 5 (24%)            |       |
| High-sensitivity C-reactive Protein (hs-CRP), mg/L | <1        | 52.2(9.6-114.7)    | 102.1(51.3-194.8)    | 27.0(5.5-71.1)     | 0.009 |
| <3                                                 |           | 4 (13%)            | 0 (0%)               | 4 (19%)            | 0.272 |
| ≥3                                                 |           | 28 (87%)           | 11 (100%)            | 17 (81%)           |       |
| IL-1β, pg/ml                                       | <5        | 4.9(4.7-4.9)       | 4.9(4.2-4.9)         | 4.9(4.7-4.9)       | 0.652 |
| IL-2R, U/ml                                        | 223-710   | 514.0(292.5-744.5) | 1076.5(671.8-1699.5) | 454.5(270.3-563.0) | 0.005 |
| IL-6, pg/ml                                        | <7        | 4.5(1.4-22.6)      | 65.1(11.3-154.1)     | 3.3(1.4-16.7)      | 0.019 |
| IL-8, pg/ml                                        | <62       | 10.2(6.1-18.9)     | 27.6(14.1-64.9)      | 9.4(5.7-15.9)      | 0.010 |
| IL-10, pg/ml                                       | <9.1      | 4.9(4.0-4.9)       | 8.3(4.9-17.0)        | 4.9(4.0-4.9)       | 0.081 |
| TNF-α, pg/ml                                       | <8.1      | 7.0(4.9-9.6)       | 21.3(13.2-28.9)      | 5.7(3.8-7.9)       | 0.000 |

Data are median (IQR), n (%), or n/N (%), where N is the total number of patients with available data.  $\chi^2$  test, Fisher's exact test, or Mann-Whitney U test were used to compare the values between survivors and non-survivors as appropriate.

**Table S3. Risk factors associated with fatality**

|                                                  | Univariable<br>OR (95% CI) | p value | Multivariable<br>OR (95% CI) | p value |
|--------------------------------------------------|----------------------------|---------|------------------------------|---------|
| <b>Demographics and clinical characteristics</b> |                            |         |                              |         |
| Age, years*                                      | 1.07(1.02-1.11)            | 0.006   | 1.062(1.005-1.123)           | 0.033   |
| <65                                              | 1 (ref)                    | ..      | ..                           | ..      |
| ≥65                                              | 4.17(1.34-13.02)           | 0.014   | ..                           | ..      |
| Female sex (vs male)                             | 0.45(0.13-1.52)            | 0.196   | ..                           | ..      |
| Comorbidity present<br>(vs not present)          |                            |         |                              |         |
| Diabetes                                         | 0.88(0.18-4.34)            | 0.871   | ..                           | ..      |
| Hypertension                                     | 2.30(0.75-7.03)            | 0.120   | ..                           | ..      |
| Coronary heart disease                           | 6.54(0.85-50.54)           | 0.072   | ..                           | ..      |
| Other                                            | 1.39(0.43-4.50)            | 0.582   | ..                           | ..      |
| Current smoker                                   | 0.96(0.11-8.63)            | 0.974   |                              |         |
| <b>Laboratory findings</b>                       |                            |         |                              |         |
| White blood cell count,<br>× 10 <sup>9</sup> /L  | 1.29(1.07-1.56)            | 0.008   | ..                           | ..      |
| <4                                               | 0.84(0.09-7.43)            | 0.873   | ..                           | ..      |
| 4–10                                             | 1 (ref)                    | ..      | ..                           | ..      |
| >10                                              | 5.03(1.44-17.54)           | 0.011   | ..                           | ..      |
| Neutrophil count, × 10 <sup>9</sup> /L*          | 1.33(1.11-1.59)            | 0.002   | ..                           | ..      |
| Lymphocyte count, × 10 <sup>9</sup> /L*          | 0.17(0.04-0.79)            | 0.024   | ..                           | ..      |
| Platelet count, × 10 <sup>9</sup> /L             | 0.98(0.97-0.99)            | 0.001   | ..                           | ..      |
| <125                                             | 16.93(4.66-61.51)          | 0.000   | ..                           | ..      |
| ≥125                                             | 1 (ref)                    | ..      | ..                           | ..      |
| Lactate dehydrogenase,<br>U/L*                   | 1.01(1.00-1.02)            | 0.000   | 1.010(1.005-1.015)           | 0.000   |
| ≤225                                             | 1 (ref)                    | ..      | ..                           | ..      |
| >225                                             | 5.97(0.75-47.77)           | 0.092   | ..                           | ..      |
| D-dimer, µg/mL                                   | 1.14(1.04-1.25)            | 0.007   | ..                           | ..      |
| ≤0.5                                             | 1 (ref)                    | ..      | ..                           | ..      |
| >0.5 to ≤1                                       | 0.96(0.06-16.21)           | 0.980   | ..                           | ..      |
| >1                                               | 10.97(1.35-89.34)          | 0.025   | ..                           | ..      |
| Prothrombin time, s                              | 1.08(0.96-1.21)            | 0.210   | ..                           | ..      |
| <14.5                                            | 1 (ref)                    | ..      | ..                           | ..      |
| ≥14.5                                            | 6.45(1.88-22.14)           | 0.003   | ..                           | ..      |
| Hypersensitive troponin I,<br>pg/mL              | 1.00(0.99-1.01)            | 0.313   | ..                           | ..      |
| ≤34.2                                            | 1 (ref)                    | ..      | ..                           | ..      |
| >34.2                                            | 11.67(3.15-43.26)          | 0.000   | ..                           | ..      |
| NT-proB-type natriuretic<br>peptide (BNP), pg/mL | 1.00(1.00-1.00)            | 0.706   | ..                           | ..      |

|                                                     |                    |       |    |    |
|-----------------------------------------------------|--------------------|-------|----|----|
| <241                                                | 1 (ref)            | ..    | .. | .. |
| ≥241                                                | 35.61(4.41-287.68) | 0.001 | .. | .. |
| Albumin, g/L                                        | 0.82(0.71-0.93)    | 0.003 | .. | .. |
| <35                                                 | 8.00(1.70-37.60)   | 0.008 | .. | .. |
| ≥35                                                 | 1 (ref)            | ..    | .. | .. |
| Alanine aminotransferase, U/L                       | 0.97(0.93-1.02)    | 0.204 | .. | .. |
| ≤41                                                 | 1 (ref)            | ..    | .. | .. |
| >41                                                 | 0.34(0.04-2.81)    | 0.319 | .. | .. |
| Creatinine, μmol/L                                  | 1.00(0.99-1.01)    | 0.535 | .. | .. |
| ≤104                                                | 1 (ref)            | ..    | .. | .. |
| >104                                                | 7.62(2.10-27.68)   | 0.002 | .. | .. |
| Blood urea nitrogen, mmol/L                         | 1.12(1.02-1.23)    | 0.018 | .. | .. |
| ≤9.5                                                | 1 (ref)            | ..    | .. | .. |
| >9.5                                                | 18.16(4.36-75.62)  | 0.000 | .. | .. |
| Procalcitonin, ng/mL*                               | 1.86(0.82-4.20)    | 0.138 | .. | .. |
| High-sensitivity C-reactive Protein (hs-CRP), mg/L* | 1.01(1.00-1.02)    | 0.005 | .. | .. |
| IL-2R, U/ml*                                        | 1.003(1.001-1.004) | 0.001 | .. | .. |
| IL-6, pg/ml*                                        | 1.02(1.01-1.04)    | 0.002 | .. | .. |
| TNF-α, pg/ml*                                       | 1.19(1.06-1.34)    | 0.005 | .. | .. |

OR=odds ratio. \*Per 1 unit increase.



**Table S4. Risk factors associated with fatality of the subset of patients with CT severity scores within the first week after symptom onset**

|                                                              | Univariable<br>OR (95% CI) | p<br>value | Multivariable<br>OR (95% CI) | p<br>value |
|--------------------------------------------------------------|----------------------------|------------|------------------------------|------------|
| <b>Demographics</b>                                          |                            |            |                              |            |
| Age, years*                                                  | 1.06(1.01-1.13)            | 0.027      | ..                           | ..         |
| <b>Laboratory findings on admission</b>                      |                            |            |                              |            |
| Lymphocyte count,<br>× 10 <sup>9</sup> /L*                   | 0.53(0.09-3.03)            | 0.474      | ..                           | ..         |
| Lactate dehydrogenase, U/L                                   | 1.01(1.00-1.02)            | 0.003      | ..                           | ..         |
| ≤225                                                         | 1 (ref)                    | ..         | ..                           | ..         |
| >225                                                         | 6.15(0.66-57.60)           | 0.111      | ..                           | ..         |
| D-dimer, µg/mL                                               | 9.30(1.85-46.74)           | 0.007      | ..                           | ..         |
| ≤0.5                                                         | 1 (ref)                    | ..         | ..                           | ..         |
| >0.5 to ≤1                                                   | ..                         | ..         | ..                           | ..         |
| >1                                                           | 23.33(1.99-273.29)         | 0.012      | ..                           | ..         |
| Hypersensitive troponin I,<br>pg/mL                          | 1.00(0.99-1.01)            | 0.411      | ..                           | ..         |
| ≤34.2                                                        | 1 (ref)                    | ..         | ..                           | ..         |
| >34.2                                                        | 7.50(1.14-49.26)           | 0.036      | ..                           | ..         |
| <b>CT findings within the first week after symptom onset</b> |                            |            |                              |            |
| Total severity score*                                        | 1.39(1.12-1.72)            | 0.003      | 1.544(1.004-2.374)           | 0.048      |
| <15                                                          | 1 (ref)                    | ..         | ..                           | ..         |
| ≥15                                                          | 35.00(3.32-368.57)         | 0.003      | ..                           | ..         |
| Number of involved lung<br>lobes                             | 1.366(1.003-1.860)         | 0.048      | ..                           | ..         |
| <5                                                           | 1 (ref)                    | ..         | ..                           | ..         |
| =5                                                           | 9.00(1.52-53.40)           | 0.016      | ..                           | ..         |

OR=odds ratio. \*Per 1 unit increase.

**Table S5. Treatments and outcomes**

|                                                     | Total<br>(n=102) | Non-survivor<br>(n=15) | Survivor<br>(n=87) | p<br>value |
|-----------------------------------------------------|------------------|------------------------|--------------------|------------|
| <b>Treatments</b>                                   |                  |                        |                    |            |
| Antibiotics                                         | 81 (79%)         | 15 (100%)              | 66 (76%)           | 0.036      |
| Antiviral treatment                                 | 75 (74%)         | 7 (47%)                | 68 (78%)           | 0.011      |
| Traditional Chinese medicine                        | 79 (77%)         | 3 (20%)                | 76 (87%)           | 0.000      |
| Corticosteroids                                     | 52 (51%)         | 13 (87%)               | 39 (45%)           | 0.003      |
| Intravenous immunoglobulin                          | 19 (19%)         | 5 (33%)                | 14 (16%)           | 0.113      |
| Nasal cannula oxygen therapy                        | 76 (75%)         | 5 (33%)                | 71 (82%)           | 0.000      |
| High-flow nasal cannula oxygen therapy              | 6 (6%)           | 2 (13%)                | 4 (5%)             | 0.184      |
| Non-invasive mechanical ventilation                 | 22 (22%)         | 13 (87%)               | 9 (10%)            | 0.000      |
| Invasive mechanical ventilation                     | 3 (3%)           | 3 (20%)                | 0 (0%)             | 0.003      |
| ECMO                                                | 1 (1%)           | 1 (7%)                 | 0 (0%)             | ..         |
| Renal replacement therapy                           | 2 (2%)           | 2 (13%)                | 0 (0%)             | 0.020      |
| <b>Outcomes</b>                                     |                  |                        |                    |            |
| Respiratory failure                                 | 35 (34%)         | 15 (100%)              | 20 (23%)           | 0.000      |
| Heart failure                                       | 7 (7%)           | 4 (27%)                | 3 (3%)             | 0.001      |
| Acute kidney failure                                | 5 (5%)           | 5 (33%)                | 0 (0%)             | 0.000      |
| ICU admission                                       | 3 (3%)           | 3 (20%)                | 0 (0%)             | 0.003      |
| Hospital length of stay, days                       | 21(13-29)        | 11(7-13)               | 22(16-30)          | 0.000      |
| Time from symptom onset to ICU admission, days      | 19(21-34)        | 19(21-34)              | ..                 | ..         |
| ICU length of stay, days                            | 9(3-20)          | 9(3-20)                | ..                 | ..         |
| Time from symptom onset to death or discharge, days | 34(25-42)        | 22(17-26)              | 35(28-44)          | 0.000      |

Data are median (IQR) or n (%). p values were calculated by  $\chi^2$  test, or Fisher's exact test, as appropriate. ECMO=extracorporeal membrane oxygenation. ICU=intensive care unit.

**Table S6. Treatments and outcomes of the subset of patients included in the analysis of CT within the first week after symptom onset**

|                                                     | Total<br>(n=32) | Non-survivor<br>(n=11) | Survivor<br>(n=21) | p<br>value |
|-----------------------------------------------------|-----------------|------------------------|--------------------|------------|
| <b>Treatments</b>                                   |                 |                        |                    |            |
| Antibiotics                                         | 29 (91%)        | 11 (100%)              | 18 (86%)           | 0.188      |
| Antiviral treatment                                 | 25 (78%)        | 5 (45%)                | 20 (95%)           | 0.001      |
| Traditional Chinese medicine                        | 21 (66%)        | 1 (9%)                 | 20 (95%)           | 0.000      |
| Corticosteroids                                     | 19 (59%)        | 9 (82%)                | 10 (48%)           | 0.061      |
| Intravenous immunoglobulin                          | 7 (22%)         | 3 (27%)                | 4 (19%)            | 0.593      |
| Nasal cannula oxygen therapy                        | 19 (59%)        | 2 (18%)                | 17 (81%)           | 0.001      |
| High-flow nasal cannula oxygen therapy              | 0 (0%)          | 0 (0%)                 | 0 (0%)             | ..         |
| Non-invasive mechanical ventilation                 | 13 (41%)        | 10 (91%)               | 3 (14%)            | 0.000      |
| Invasive mechanical ventilation                     | 0 (0%)          | 0 (0%)                 | 0 (0%)             | ..         |
| ECMO                                                | 0 (0%)          | 0 (0%)                 | 0 (0%)             | ..         |
| Renal replacement therapy                           | 0 (0%)          | 0 (0%)                 | 0 (0%)             | ..         |
| <b>Outcomes</b>                                     |                 |                        |                    |            |
| Respiratory failure                                 | 18 (56%)        | 11 (100%)              | 7 (33%)            | 0.000      |
| Heart failure                                       | 3 (9%)          | 2 (18%)                | 1 (5%)             | 0.216      |
| Acute kidney failure                                | 4 (13%)         | 4 (36%)                | 0 (0%)             | 0.009      |
| ICU admission                                       | 0 (0%)          | 0 (0%)                 | 0 (0%)             | ..         |
| Hospital length of stay, days                       | 17(11-26)       | 10(7-12)               | 23(16-30)          | 0.000      |
| Time from symptom onset to ICU admission, days      | 0 (0%)          | 0 (0%)                 | 0 (0%)             | ..         |
| ICU length of stay, days                            | 0 (0%)          | 0 (0%)                 | 0 (0%)             | ..         |
| Time from symptom onset to death or discharge, days | 28(22-35)       | 20(16-25)              | 34(27-38)          | 0.000      |

The counting data were presented as count (percentage of the total). p values were calculated by  $\chi^2$  test, or Fisher's exact test, as appropriate.
